# Supplementary material for: Roles of Ambient Temperature and PM2.5 on Childhood Acute Bronchitis and Bronchiolitis from Viral Infection
Source: MDPI journal article supplement (doi:10.3390/v14091932), 2022-08-30

**Supplement Figure S1. Lag 1-, 3- and 7-day adjusted relative risk (RR) and 95% confidence interval (CI) of acute bronchitis and acute bronchiolitis associated with temperature and PM<sub>2.5</sub> level controlling for income, SO<sub>2</sub> and O<sub>3</sub> levels**

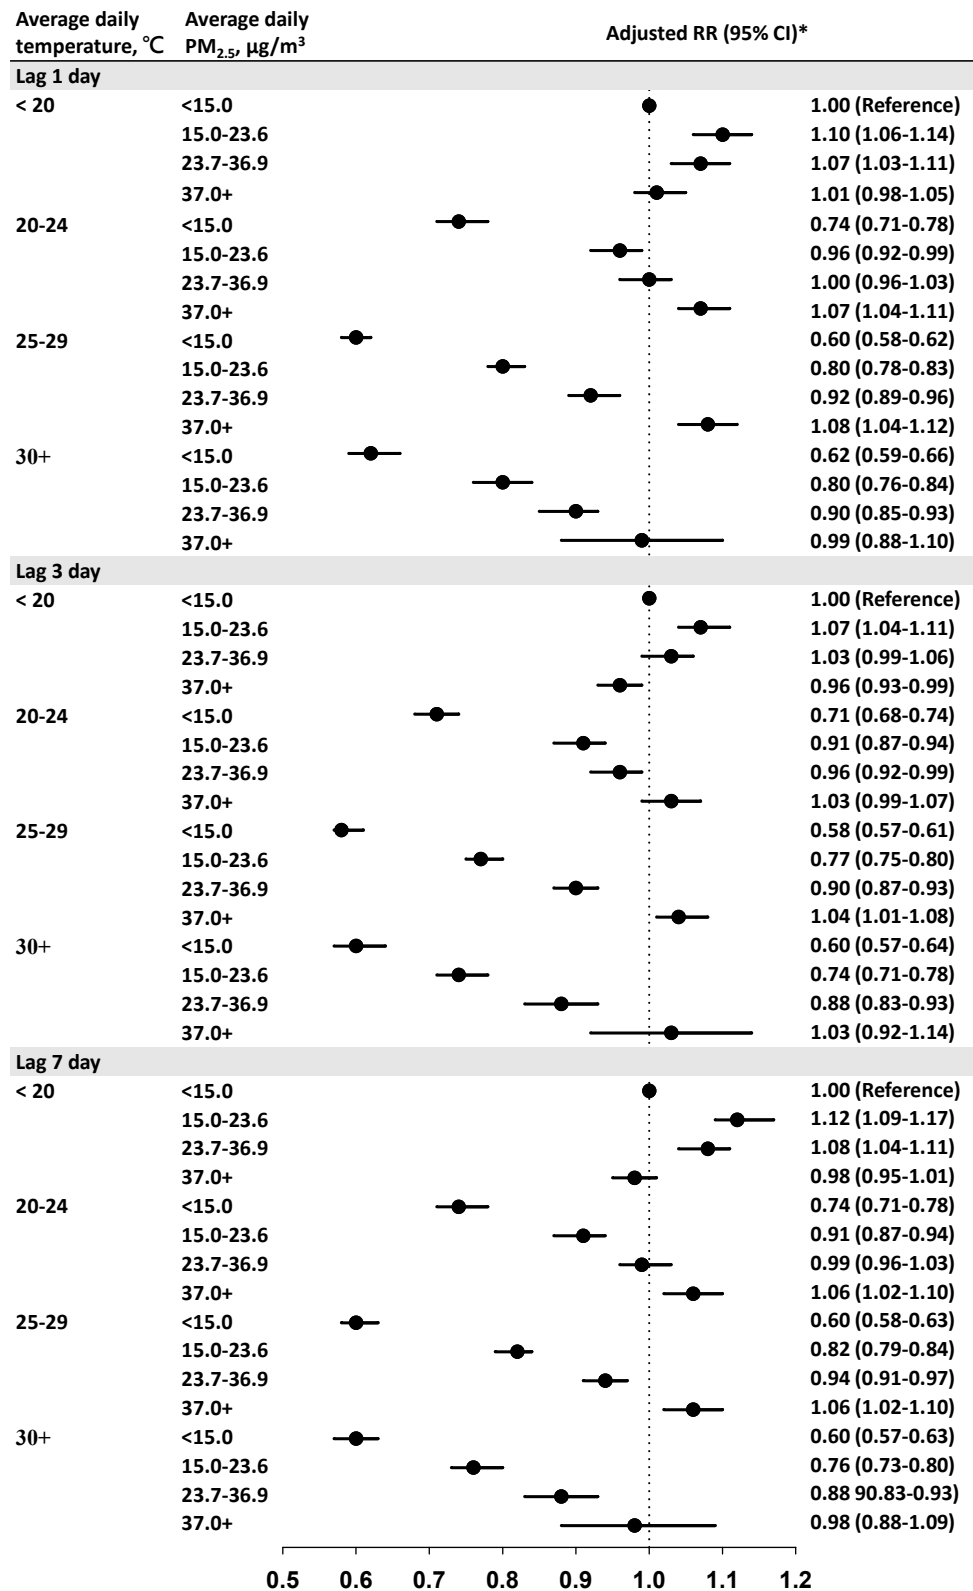

Supplement: s1 [file s1]
